# Supplementary material for: Cayratia japonica Prevents Ulcerative Colitis by Promoting M2 Macrophage Polarization through Blocking the TLR4/MAPK/NF-κB Pathway
Source: Mediators Inflamm. 2022 Dec 30;2022:1108569. doi: 10.1155/2022/1108569 (PMC9822765; doi:10.1155/2022/1108569)
Supplement: Supplementary Materials — Supplementary Figure 1: representative images for Figures 3(e), 4(e), and 5(g). Supplementary Table 1: primer sequence for RT-qPCR. Supplementary Table 2: DAI scoring system. [file 1108569.f1.zip]

Archive with 2 entries (2 files):
- Figure S1.eps
- Supplemental Files (1).docx
